# Supplementary material
Source: MDPI journal article supplement (https://www.mdpi.com/2073-4344/12/3/348)
Supplement: s1 [file s1 › catalysts-1590588-supplementary.pdf]

# Selective and Efficient Reduction of Nitrate to Gaseous Nitrogen from Drinking Water Source by UV/Oxalic Acid/Ferric Iron Systems: Effectiveness and Mechanisms

Zhiyuan Shi <sup>1</sup>, Falu Wang <sup>2,3,4</sup>, Qian Xiao <sup>2,3,\*</sup>, Shuili Yu <sup>2,3,\*</sup> and Xingli Ji <sup>2,3</sup>

<sup>1</sup> SIIC Environment Holdings Ltd., Shanghai 200021, China; shizhiyuan@siic.com

<sup>2</sup> State Key Laboratory of Pollution Control and Resource Reuse, College of Environmental Science and Engineering, Tongji University, Siping Campus, Shanghai 200092, China; wangfalu@smedi.com (F.W.); jixingli@tongji.edu.cn (X.J.)

<sup>3</sup> Shanghai Institute of Pollution Control and Ecological Security, Siping Campus, Shanghai 200092, China

<sup>4</sup> Shanghai Municipal Engineering Design Institute (Group) Co., Ltd., Shanghai 200092, China

\* Correspondence: 2015xiaoqian@tongji.edu.cn (Q.X.); ysl@tongji.edu.cn (S.Y.);

Tel./Fax: +86-21-6598-2708 (Q.X. & S.Y.)

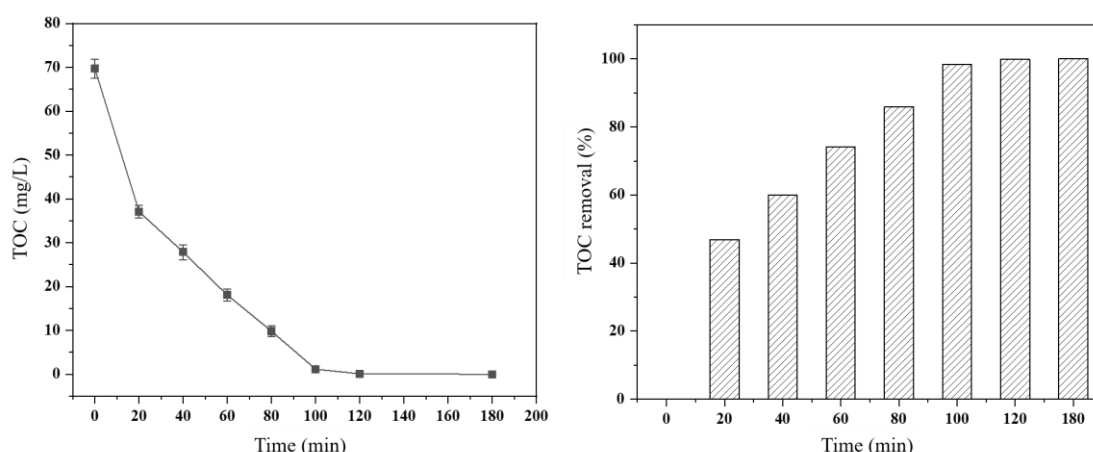

**Figure S1.** Mineralization of oxalic acid in the UV/C<sub>2</sub>O<sub>4</sub><sup>2-</sup>/Fe<sup>3+</sup> systems. Experimental conditions: [NO<sub>3</sub><sup>-</sup>]<sub>0</sub> = 60 mg/L, [C<sub>2</sub>O<sub>4</sub><sup>2-</sup>]<sub>0</sub> = 3 mM, [Fe<sup>3+</sup>]<sub>0</sub> = 0.05 mM, I<sub>0</sub> = 10.2 mW/cm<sup>2</sup> (wavelength = 365 nm), [DO]<sub>0</sub> = 0.5 ± 0.1 mg/L, pH<sub>ini.</sub> = 7.0 ± 0.2, and T = 25 ± 0.5 °C. Error bars represent the standard deviation from three times experiments. Error bars smaller than symbols are not visible.

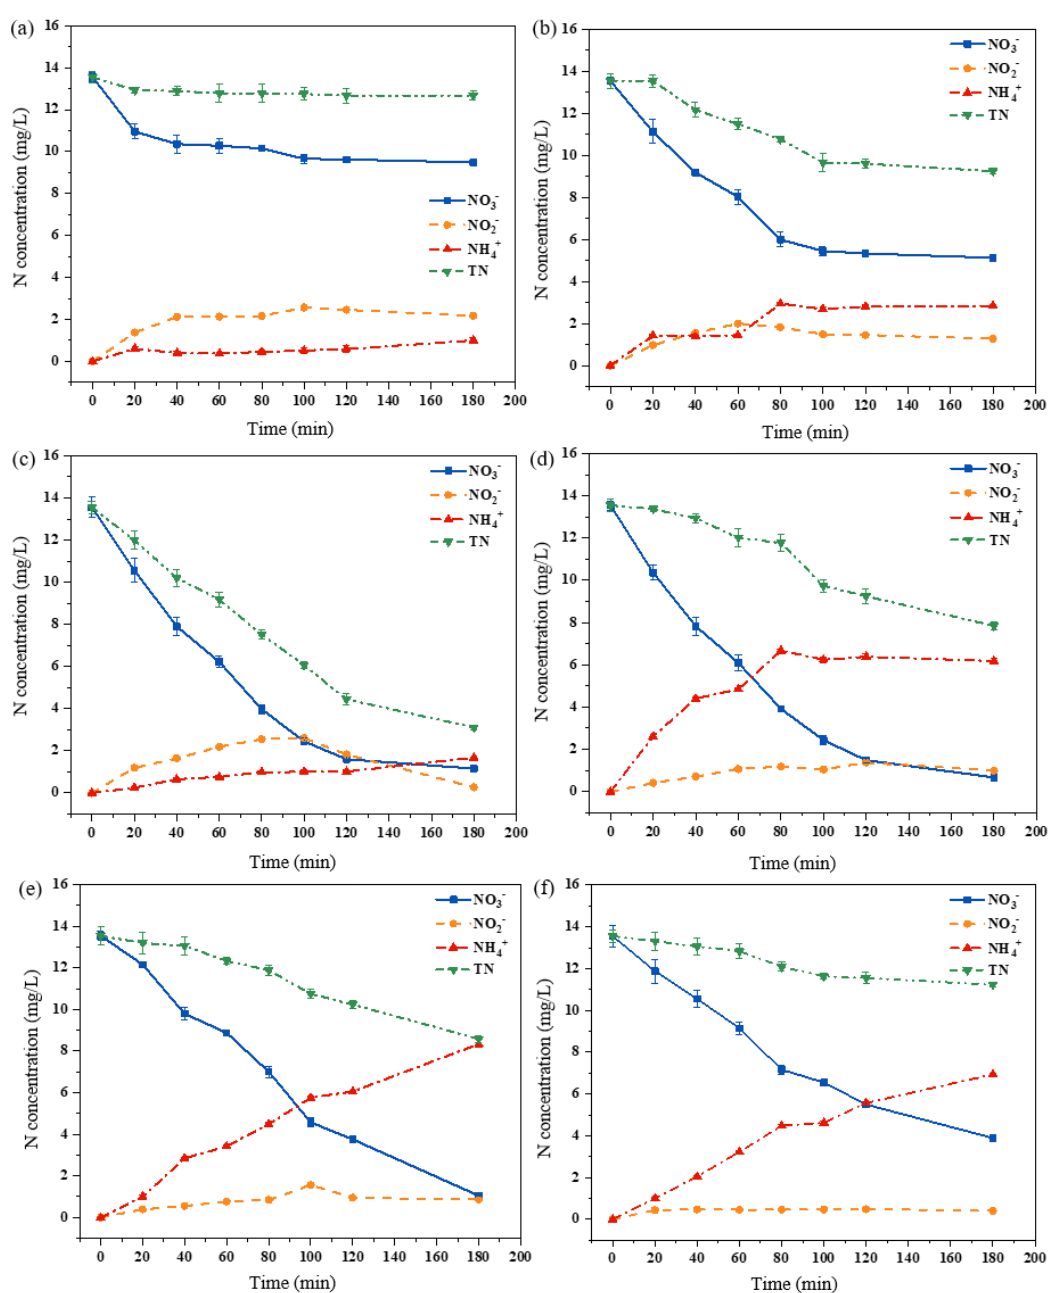

**Figure S2.** Formation of primary products at different dosage of oxalate acids during reduction of  $\text{NO}_3^-$  in the  $\text{UV}/\text{C}_2\text{O}_4^{2-}/\text{Fe}^{3+}$  systems. Experimental conditions:  $[\text{NO}_3^-]_0 = 60$  mg/L,  $[\text{C}_2\text{O}_4^{2-}]_0 = 1, 2, 3, 4, 5, 6$  mM in (a), (b), (c), (d), (e), and (f), respectively,  $[\text{Fe}^{3+}]_0 = 0.05$  mM,  $I_0 = 10.2$  mW/cm<sup>2</sup> (wavelength = 365 nm),  $[\text{DO}]_0 = 0.5 \pm 0.1$  mg/L,  $\text{pH}_{\text{ini.}} = 7.0 \pm 0.2$ , and  $T = 25 \pm 0.5$  °C. Error bars represent the standard deviation from three times experiments. Error bars smaller than symbols are not visible.

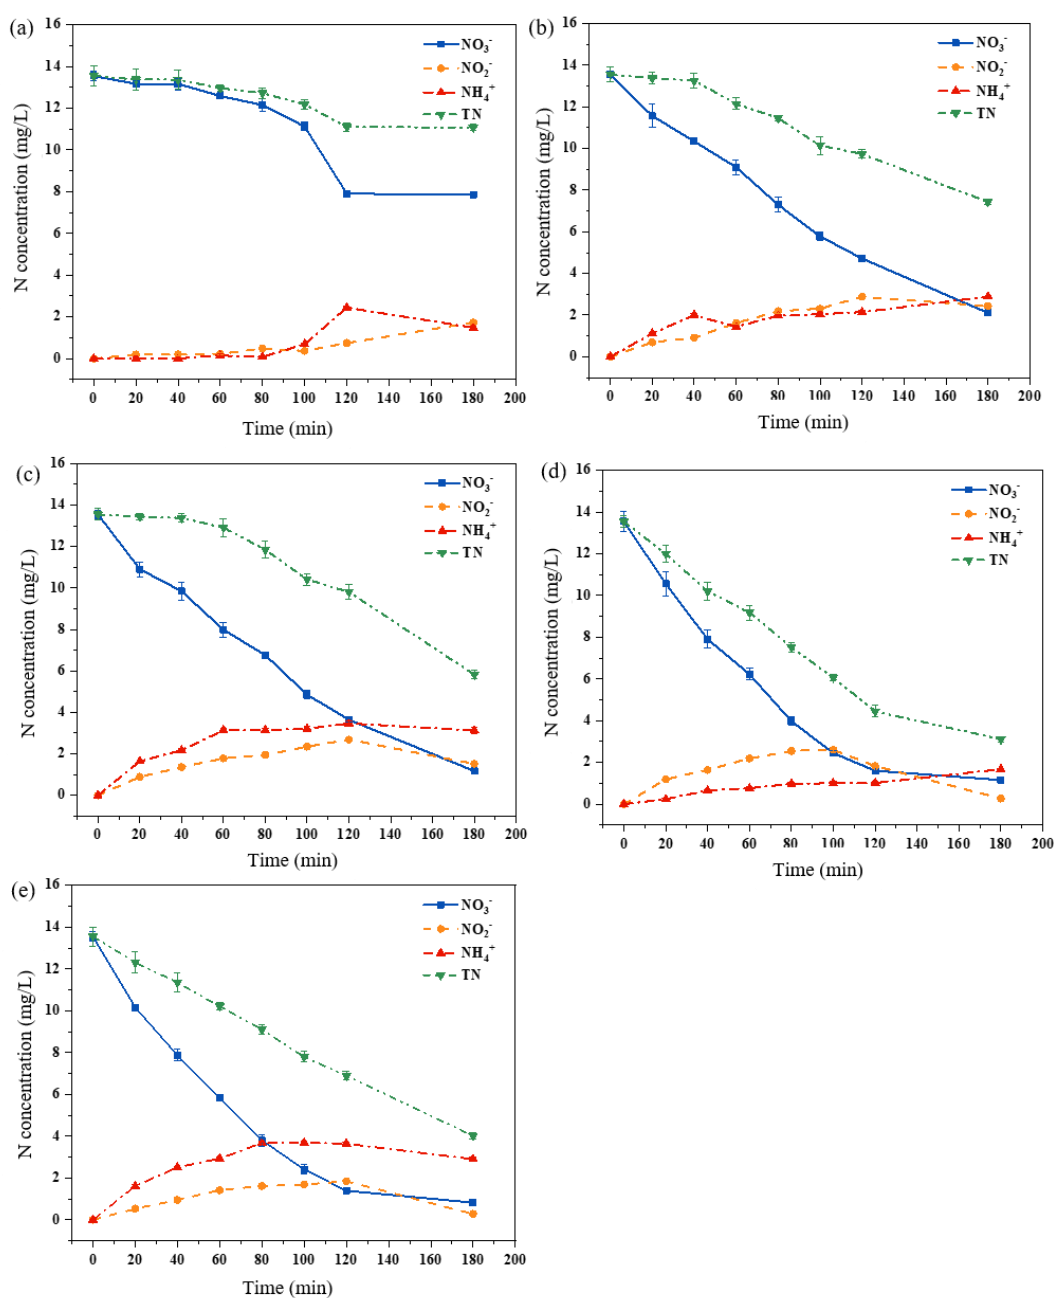

**Figure S3.** Formation of primary products at different initial  $\text{Fe}^{3+}$  levels during reduction of  $\text{NO}_3^-$  in the UV/ $\text{C}_2\text{O}_4^{2-}$ / $\text{Fe}^{3+}$  systems. Experimental conditions:  $[\text{NO}_3^-]_0 = 60$  mg/L,  $[\text{C}_2\text{O}_4^{2-}]_0 = 3$  mM,  $[\text{Fe}^{3+}]_0 = 0, 0.017, 0.025, 0.05,$  and  $0.1$  mM, respectively, in (a), (b), (c), (d), and (e),  $I_0 = 10.2$  mW/cm<sup>2</sup> (wavelength = 365 nm),  $[\text{DO}]_0 = 0.5 \pm 0.1$  mg/L,  $\text{pH}_{\text{ini.}} = 7.0 \pm 0.2$ , and  $T = 25 \pm 0.5$  °C. Error bars represent the standard deviation from three times experiments. Error bars smaller than symbols are not visible.

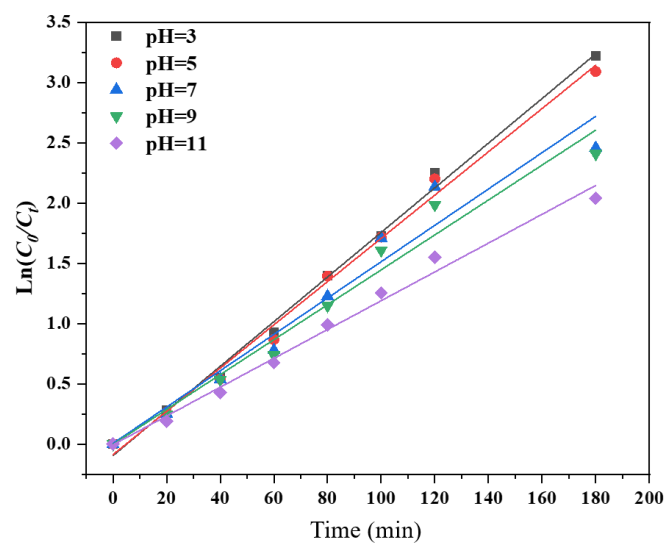

**Figure S4.** The  $\ln(C_0/C_t)$  value versus reaction time at various solution pH in the UV/ $C_2O_4^{2-}/Fe^{3+}$  systems. Experimental conditions:  $[NO_3^-]_0 = 60$  mg/L,  $[C_2O_4^{2-}]_0 = 3$  mM,  $[Fe^{3+}]_0 = 0.05$  mM, power of the UV-M = 500 W,  $[DO]_0 = 0.5 \pm 0.1$  mg/L, and  $T = 25 \pm 0.5$  °C. Error bars represent the standard deviation from three times experiments. Error bars smaller than symbols are not visible.

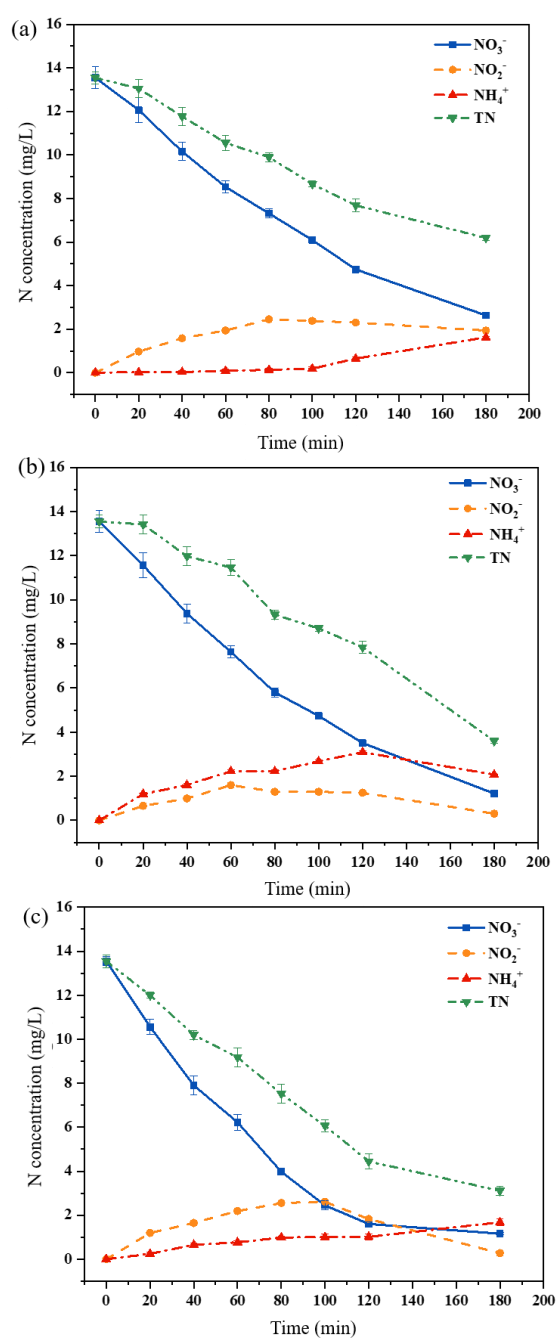

**Figure S5.** Formation of primary products at different UV lamp power during reduction of  $\text{NO}_3^-$  in the  $\text{UV}/\text{C}_2\text{O}_4^{2-}/\text{Fe}^{3+}$  systems. Experimental conditions:  $[\text{NO}_3^-]_0 = 60 \text{ mg/L}$ ,  $[\text{C}_2\text{O}_4^{2-}]_0 = 3 \text{ mM}$ ,  $[\text{Fe}^{3+}]_0 = 0.05 \text{ mM}$ , power of the UV-M = 100, 300, and 500 W, respectively in (a), (b), and (c),  $[\text{DO}]_0 = 0.5 \pm 0.1 \text{ mg/L}$ ,  $\text{pH}_{\text{ini.}} = 7.0 \pm 0.2$ , and  $T = 25 \pm 0.5 \text{ }^\circ\text{C}$ . Error bars represent the standard deviation from three times experiments. Error bars smaller than symbols are not visible.

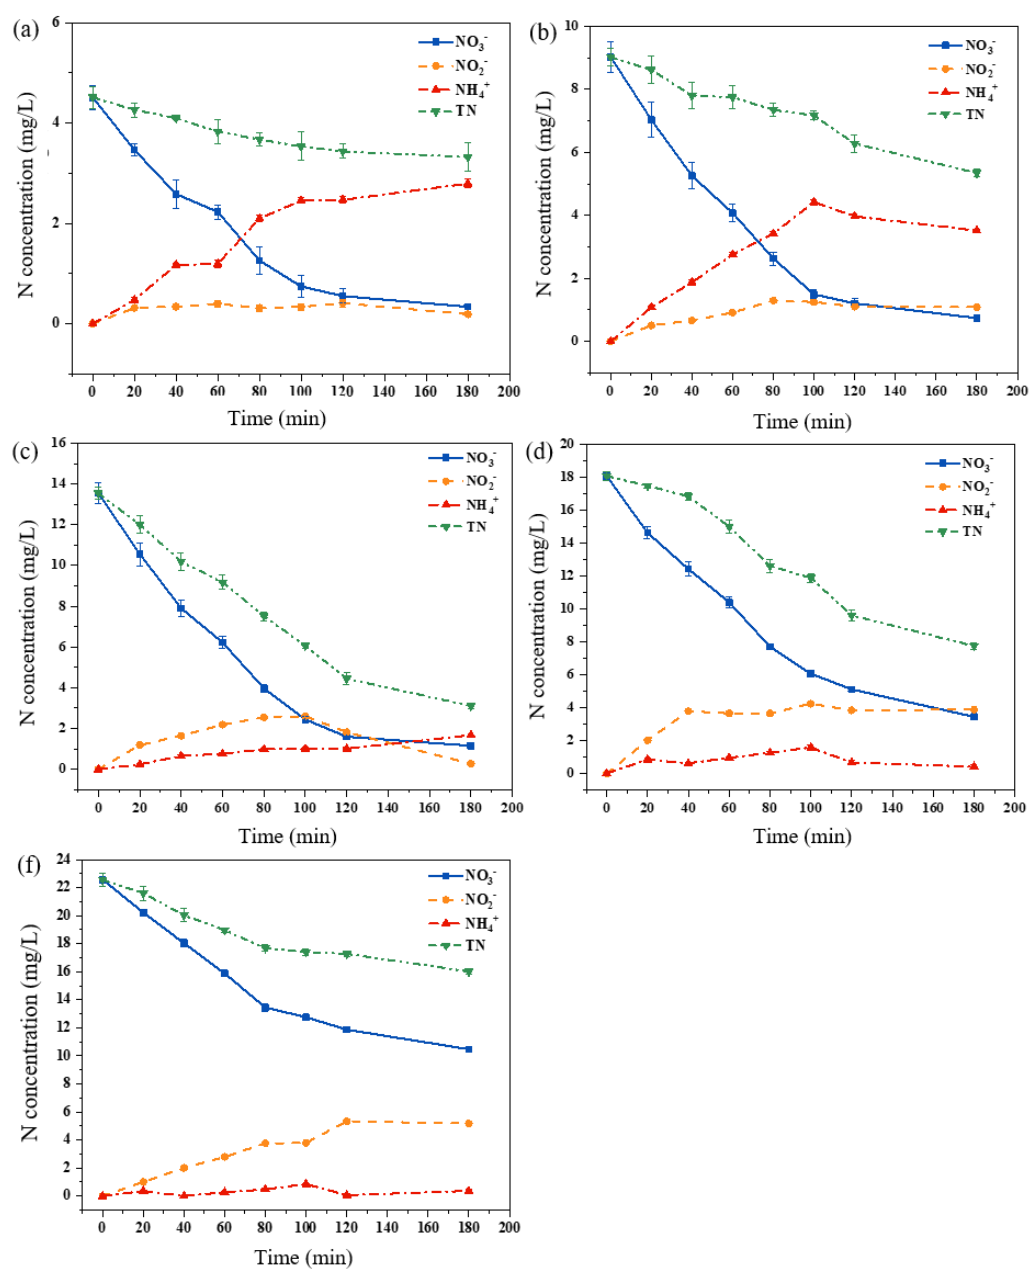

**Figure S6.** Formation of primary products at various initial  $\text{NO}_3^-$  levels during reduction of  $\text{NO}_3^-$  in the  $\text{UV}/\text{C}_2\text{O}_4^{2-}/\text{Fe}^{3+}$  systems. Experimental conditions:  $[\text{NO}_3^-]_0 = 20, 40, 60, 80$ , and  $100$  mg/L, respectively, in (a), (b), (c), (d), and (e),  $[\text{C}_2\text{O}_4^{2-}]_0 = 3$  mM,  $[\text{Fe}^{3+}]_0 = 0.05$  mM, the UV-M power =  $500$  W,  $[\text{DO}]_0 = 0.5 \pm 0.1$  mg/L,  $\text{pH}_{\text{ini.}} = 7.0 \pm 0.2$ , and  $T = 25 \pm 0.5$  °C. Error bars represent the standard deviation from three times experiments. Error bars smaller than symbols are not visible.

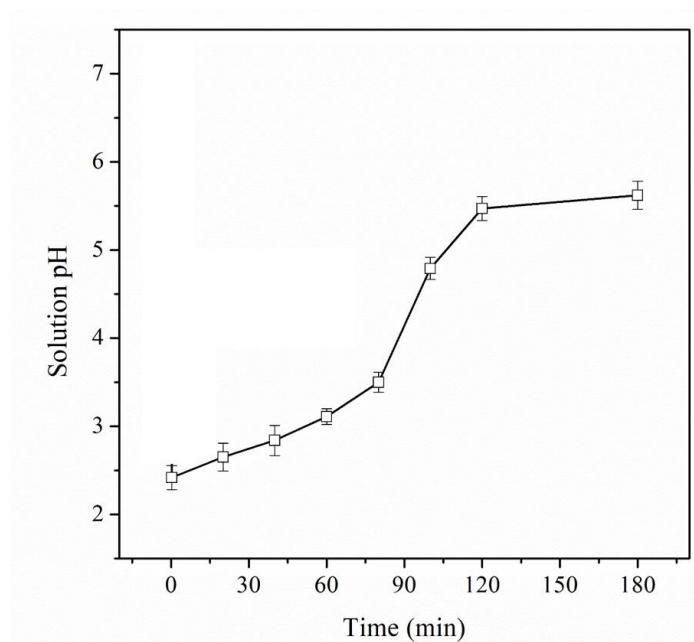

**Figure S7.** The variation of solution pH with time in the UV/C<sub>2</sub>O<sub>4</sub><sup>2-</sup>/Fe<sup>3+</sup> systems. Experimental conditions: [NO<sub>3</sub><sup>-</sup>]<sub>0</sub> = 60 mg/L, [C<sub>2</sub>O<sub>4</sub><sup>2-</sup>]<sub>0</sub> = 3 mM, [Fe<sup>3+</sup>]<sub>0</sub> = 0.05 mM, I<sub>0</sub> = 10.2 mW/cm<sup>2</sup> (wavelength = 365 nm), [DO]<sub>0</sub> = 0.5 ± 0.1 mg/L, and T = 25 ± 0.5 °C. Error bars represent the standard deviation from three times experiments.

**Table S1.** The characteristics of simulated groundwater.

| Water quality indexes         | Level (mg/L) | Water quality indexes         | Level (mg/L) |
|-------------------------------|--------------|-------------------------------|--------------|
| NO <sub>3</sub> <sup>-</sup>  | 124          | Mg <sup>2+</sup>              | 48           |
| HCO <sub>3</sub> <sup>-</sup> | 122          | Cl <sup>-</sup>               | 142          |
| K <sup>+</sup>                | 78           | SO <sub>4</sub> <sup>2-</sup> | 384          |
| Na <sup>+</sup>               | 184          | TOC                           | 3.0          |
| Ca <sup>2+</sup>              | 40           |                               |              |

**Table S2.** Kinetic parameters of NO<sub>3</sub><sup>-</sup> reduction at various Fe<sup>3+</sup> levels.

| Fe <sup>3+</sup> level (mM) | First-order reaction kinetic equations | k     | R <sup>2</sup> |
|-----------------------------|----------------------------------------|-------|----------------|
| 0                           | y=0.00182x-0.01802                     | 0.002 | 0.862          |
| 0.017                       | y=0.01022x-0.11464                     | 0.010 | 0.972          |
| 0.025                       | y=0.01321x-0.17208                     | 0.013 | 0.953          |
| 0.05                        | y=0.01507x-0.00628                     | 0.015 | 0.951          |
| 0.1                         | y=0.01671x-0.03667                     | 0.017 | 0.973          |

**Table S3.** Kinetic parameters of NO<sub>3</sub><sup>-</sup> reduction at different initial solution pH.

| pH <sub>ini.</sub> | First-order reaction kinetic equations | k       | R <sup>2</sup> |
|--------------------|----------------------------------------|---------|----------------|
| 3                  | y=0.01851x-0.09488                     | 0.01851 | 0.99394        |
| 5                  | y=0.01794x-0.08683                     | 0.01794 | 0.99196        |
| 7                  | y=0.01507x+0.00628                     | 0.01507 | 0.95144        |
| 9                  | y=0.01448x-0.00226                     | 0.01448 | 0.96644        |
| 11                 | y=0.01195x-0.00559                     | 0.01195 | 0.98780        |

**Table S4.** Kinetic parameters of NO<sub>3</sub><sup>-</sup> reduction at different UV light intensity.

| Power of UV-M (W) | First-order reaction kinetic equations | k     | R <sup>2</sup> |
|-------------------|----------------------------------------|-------|----------------|
| 100               | y=0.0092x-0.06888                      | 0.009 | 0.992          |
| 300               | y=0.00992x-0.06525                     | 0.010 | 0.993          |
| 500               | y=0.01507x-0.00628                     | 0.015 | 0.951          |
